# Supplementary material
Source: PubMed Central journal article supplement (PMC6973545)
Supplement: DC182316SupplementaryData.pdf [file DC182316SupplementaryData.pdf]

SUPPLEMENTARY DATA

**Supplementary Table 1. Differences in DKA Adjudication Definition (note: the are not head-to-head trials)**

| Tandem Program <sup>1-3</sup>                                                             | DEPICT Program <sup>4,5,6</sup>                            | EASE Program <sup>7</sup>             |
|-------------------------------------------------------------------------------------------|------------------------------------------------------------|---------------------------------------|
| Adjudicated DKA was characterised as:                                                     | Adjudicated DKA was characterised as:                      | Adjudicated DKA was characterised as: |
| Yes, with certainty                                                                       | Definite                                                   | Certain                               |
| Yes, probably                                                                             | Possible                                                   | Potential                             |
| No, unlikely                                                                              | Unlikely                                                   | Ketosis (not DKA)                     |
| No, with certainty                                                                        | Only “definite” was adjudicated positively as a DKA event. | Unlikely                              |
| Unclassifiable                                                                            |                                                            | Unclassifiable                        |
| Insufficient data                                                                         |                                                            |                                       |
| “yes, with certainty” and “yes, probably” were both adjudicated positively as a DKA event |                                                            |                                       |

DKA=diabetic ketoacidosis

References: 1. Buse B, et al. *Diabetes Care* 2018;41:1970–80 & Supplementary Appendix; 2. Danne T, et al. *Diabetes Care* 2018;41:1981–90 & Supplementary Appendix. 3. Garg SK et al. *N Engl J Med.* 2017;377:2337–2348  
 4. Dandona P, et al. *Lancet Diabetes Endocrinol* 2017;5:864–76. 5. Mathieu C, et al. *Diabetes Care* 2018;41:1938–46. 6. Dandona et al. *Diabetes Care.* 2018 Oct 23. pii: dc181087. doi: 10.2337/dc18-1087 7. Rosenstock J, et al. *Diabetes Care* 2018; doi.org/10.2337/dc18-1749.

SUPPLEMENTARY DATA

**Supplementary Table 2. Incidence of reported DKA from Tandem1 and Tandem2**

***A. Diabetic ketoacidosis at 24 weeks inTandem1 and inTandem2***

|                                                                     | inTandem1 <sup>1</sup> |             |             | inTandem2 <sup>2</sup> |             |             |
|---------------------------------------------------------------------|------------------------|-------------|-------------|------------------------|-------------|-------------|
| Dose                                                                | PBO                    | SOTA 200 mg | SOTA 400 mg | PBO                    | SOTA 200 mg | SOTA 400 mg |
| N                                                                   | 268                    | 263         | 262         | 258                    | 261         | 263         |
| Patients with ≥1 Certain DKA event                                  | 0                      | 3           | 8           | 0                      | 2           | 3           |
| Patients with ≥1 Probable DKA event                                 | 0                      | 0           | 0           | 0                      | 0           | 1           |
| Certain + Probable DKA                                              | 0                      | 3           | 8           | 0                      | 2           | 4           |
| % Patients with ≥1 Certain+ Probable DKA                            | 0                      | 1.1         | 3.1         | 0                      | 0.8         | 1.5         |
| % difference versus placebo in patients with Certain+ Probable DKA* | N/A                    | 1.1         | 3.1         | N/A                    | 0.8         | 1.5         |

DKA=diabetic ketoacidosis; PBO=placebo; SOTA= sotagliflozin

SUPPLEMENTARY DATA

**B. Diabetic ketoacidosis at 52 weeks inTandem1 and inTandem2**

|                                                                              | inTandem1 <sup>1</sup> |                |                   | inTandem2 <sup>2</sup> |                |                | Total<br>inTandem1 & 2 <sup>3</sup> |                |                |
|------------------------------------------------------------------------------|------------------------|----------------|-------------------|------------------------|----------------|----------------|-------------------------------------|----------------|----------------|
| Dose                                                                         | PBO                    | SOTA<br>200 mg | SOTA<br>400<br>mg | PBO                    | SOTA<br>200 mg | SOTA<br>400 mg | PBO                                 | SOTA<br>200 mg | SOTA<br>400 mg |
| N                                                                            | 268                    | 263            | 262               | 258                    | 261            | 263            | 526                                 | 524            | 525            |
| Patients with ≥1<br>Certain DKA event                                        | 0                      | 9              | 11                | 0                      | 5              | 8              | 0                                   | 14             | 19             |
| Patients with ≥1<br>Probable DKA event                                       | 1                      | 0              | 0                 | 0                      | 1              | 1              | 1                                   | 1              | 1              |
| Certain + Probable<br>DKA                                                    | 1                      | 9              | 11                | 0                      | 6              | 9              | 1                                   | 15             | 20             |
| % Patients with<br>≥1 Certain+<br>Probable DKA                               | 0.4                    | 3.4            | 4.2               | 0                      | 2.3            | 3.4            | 0.2                                 | 2.9            | 3.8            |
| % difference versus<br>placebo of patients<br>with Certain+<br>Probable DKA* | N/A                    | 3.0            | 3.8               | N/A                    | 2.3            | 3.4            | N/A                                 | 2.7            | 3.6            |

DKA=diabetic ketoacidosis; PBO=placebo; SOTA= sotagliflozin

References: 1. Buse B, et al. *Diabetes Care* 2018;41:1970–80 & Supplementary Appendix; 2. Danne T, et al. *Diabetes Care* 2018;41:1981–90 & Supplementary Appendix. 3. Garg SK et al. *N Engl J Med.* 2017;377:2337–2348.

SUPPLEMENTARY DATA

**Supplementary Table 3. Diabetic ketoacidosis in DEPICT-1 and DEPICT-2**

*A. Diabetic ketoacidosis at 24 weeks in DEPICT-1 und DEPICT-2*

| Dose                                                                                               | DEPICT-1 <sup>1</sup> |              |               | DEPICT-2 <sup>2</sup> |              |               |
|----------------------------------------------------------------------------------------------------|-----------------------|--------------|---------------|-----------------------|--------------|---------------|
|                                                                                                    | PBO                   | DAPA<br>5 mg | DAPA<br>10 mg | PBO                   | DAPA<br>5 mg | DAPA<br>10 mg |
| N                                                                                                  | 260                   | 277          | 296           | 272                   | 271          | 270           |
| Patients with ≥1 Definite DKA                                                                      | 3                     | 4            | 5             | 0                     | 7            | 6             |
| Patients with ≥1 Possible DKA                                                                      | 1                     | 5            | 7             | 2                     | 6            | 4             |
| Patients with ≥1 Unlikely DKA                                                                      | 3                     | 8            | 8             | 7                     | 8            | 4             |
| <b>% Patients with DKA as defined in the protocol (definite DKA)*</b>                              | <b>1.2</b>            | <b>1.4</b>   | <b>1.7</b>    | <b>0</b>              | <b>2.6</b>   | <b>2.2</b>    |
| <b>% difference versus placebo of patients with DKA as defined in the protocol (definite DKA)*</b> | <b>N/A</b>            | <b>0.2</b>   | <b>0.5</b>    | <b>N/A</b>            | <b>2.6</b>   | <b>2.2</b>    |

DKA=diabetic ketoacidosis; PBO=placebo; DAPA= dapagliflozin

SUPPLEMENTARY DATA

**B. Diabetic ketoacidosis at 52 weeks in DEPICT-1**

|                                                                                                   | DEPICT-1 <sup>1</sup> |            |            |
|---------------------------------------------------------------------------------------------------|-----------------------|------------|------------|
| Dose                                                                                              | PBO                   | DAPA 5 mg  | DAPA 10 mg |
| N                                                                                                 | 260                   | 277        | 296        |
| Patients with ≥1 Definite DKA                                                                     | 5                     | 11         | 10         |
| Patients with ≥1 Possible DKA                                                                     | 2                     | 8          | 9          |
| Patients with ≥1 Unlikely DKA                                                                     | 3                     | 9          | 11         |
| <b>% Patients with DKA as defined in the protocol (definite DKA)*</b>                             | <b>1.9</b>            | <b>4.0</b> | <b>3.4</b> |
| <b>% difference versus placebo of patients with DKA as defined in the protocol (definite DKA)</b> | <b>N/A</b>            | <b>2.1</b> | <b>1.5</b> |

DKA=diabetic ketoacidosis; PBO=placebo; DAPA= dapagliflozin

References: Dandona et al. Lancet Diabetes Endocrinol. 2017 Nov;5(11):864-876; Mathieu C et al. DEPICT-2 Investigators. Diabetes Care. 2018 Sep;41(9):1938-1946. Dandona et al. Diabetes Care. 2018 Oct 23. pii: dc181087. doi: 10.2337/dc18-1087.

SUPPLEMENTARY DATA

**Supplementary Table 4. Diabetic ketoacidosis at 26 and 52 weeks: EASE-2 and EASE-3**

|                                         | EASE-2 & -3 pooled*<br>(EASE-2 up to 52 Weeks; EASE-3 up to 26 Weeks) |               |               | EASE-3<br>26 Weeks |                |
|-----------------------------------------|-----------------------------------------------------------------------|---------------|---------------|--------------------|----------------|
| Dose                                    | PBO                                                                   | EMPA<br>10 mg | EMPA<br>25 mg | PBO                | EMPA<br>2.5 mg |
| N                                       | 484                                                                   | 491           | 489           | 241                | 241            |
| Patients with ≥1 Certain** DKA (n/%)    | 6 (1.2)                                                               | 16 (3.3)      | 21 (4.3)      | 3 (1.2)            | 2 (0.8)        |
| Patients with ≥1 Potential*** DKA (n/%) | 6 (1.2)                                                               | 13 (2.7)      | 15 (3.1)      | 1 (0.4)            | 3 (1.2)        |

DKA=diabetic ketoacidosis; PBO=placebo; DAPA= empagliflozin

Results from adjudication based on broad trigger search criteria (1. Investigator reported terms indicative of DKA; 2. All BHB readings >1.5 and < 3.8 mmol/l and clinical manifestations suggestive of ketoacidosis; 3. Any BHB reading ≥3.8 mmol/l). \*Definition certain ketoacidosis: Acidosis and ketosis present; \*\* Definition potential ketoacidosis: Acidosis or ketosis with clinical manifestations suggestive of ketoacidosis

Reference: Rosenstock J, Marquard J, Laffel LM, et al. Empagliflozin as adjunctive to insulin therapy in type 1 diabetes: The EASE Trials. *Diabetes Care*. 2018;41(12):2560-2569.

## SUPPLEMENTARY DATA

### Supplementary Figure 1. Process for DKA monitoring and adjudication in studies.

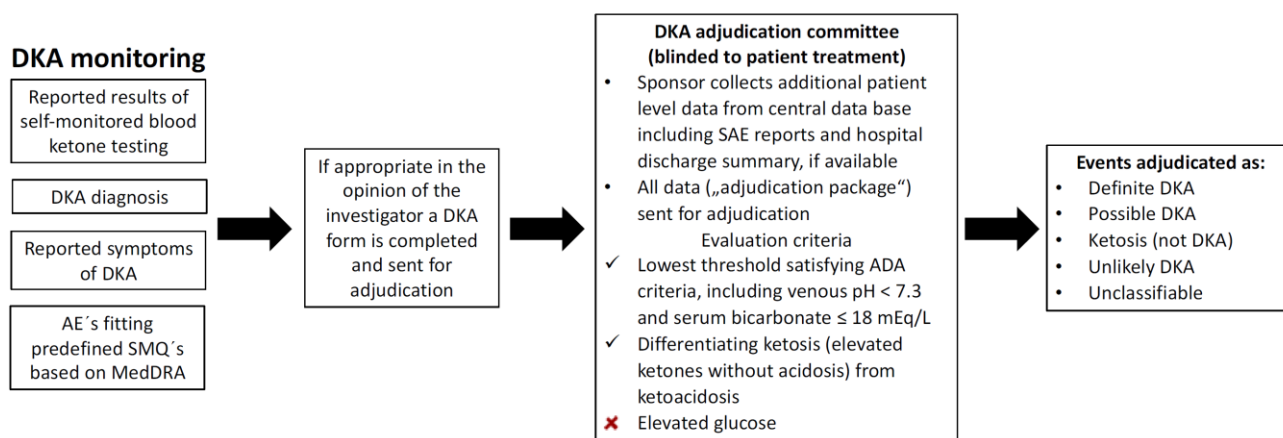

medDRA = medical Dictionary for Regulatory Activities; SMQ= standardized MedDRA query)

SUPPLEMENTARY DATA

Supplementary Figure 2. Sample wallet card. (A) front of card, (B) back of card.

A

**S**

**T** Stop SGLT inhibitor

**I** inject bolus **Insulin**

**C** consume 30 g **Carbohydrates**

**H** **Hydrate** (drink water)

Please carry this card if you are using a SGLT inhibitor with insulin to treat diabetes

B

Diabetic ketoacidosis (DKA) is always preceded by ketosis. It is possible that in patients taking SGLT inhibitors, ketosis or DKA may present with nonspecific or vague symptoms, and normal blood glucose levels, rather than high blood glucose, which is traditionally associated with DKA. Symptoms may include abdominal pain, nausea, vomiting, fatigue, and/or dyspnea. When DKA is suspected,  $\beta$ -hydroxybutyrate measurements (preferred) or urine ketones should be performed.

To correct ketosis or acidosis, it is vital to ensure that rapid acting insulin is administered frequently regardless of blood sugar levels (even if blood sugar is not elevated). Glucose-containing foods or liquids should be given when this extra insulin is administered.

Patient name: \_\_\_\_\_

If any problems occur, please contact:

Emergency contact: \_\_\_\_\_ Phone: \_\_\_\_\_

Physician name: \_\_\_\_\_ Phone: \_\_\_\_\_

(Reference: Garg et al. Diabetes Technol Ther. 2018 Sep;20(9):571-575.)
